# Supplementary material for: Microbial community dynamics in an anaerobic biofilm reactor treating heavy oil refinery wastewater
Source: Royal Society of Chemistry journal article supplement (doi:10.1039/c6ra22469e), 2016-01-01
Supplement: c6ra22469e1.pdf [file c6ra22469e1.pdf]

## *Supporting Information*

Microbial community dynamics in an anaerobic biofilm reactor treating heavy oil refinery wastewater

Honghong Dong,<sup>a</sup> Hao Dong,<sup>a</sup> Zhongzhi Zhang,<sup>\*a</sup> Shanshan Sun,<sup>a</sup> Wei Wang,<sup>a</sup> Ming Ke,<sup>\*a</sup> Zhaozheng Song,<sup>a</sup> Zhenjia Zhang,<sup>b</sup> Jianfeng Wang<sup>c</sup> and Wei-Min Wu<sup>d</sup>

<sup>a</sup> State Key Laboratory of Heavy Oil Processing, China University of Petroleum, Beijing, 102249, P. R. China

<sup>b</sup> School of Environmental Science and Engineering, Shanghai Jiao Tong University, Shanghai, 200240, P. R. China

<sup>c</sup> Core Genomic Facility, Beijing Institute of Genomics, Chinese Academy of Science, Beijing, 100101, P. R. China

<sup>d</sup> Department of Civil and Environmental Engineering, William & Cloy Codiga Resource Recovery Research Center, Center for Sustainable Development & Global Competitiveness, Stanford University, Stanford, California, CA 94305-4020, USA

\* Corresponding authors. Tel.: +86-10-89734284; Fax: +86-10-89734284; E-mail address: bjzzzhang@163.com and keming@cup.edu.cn.

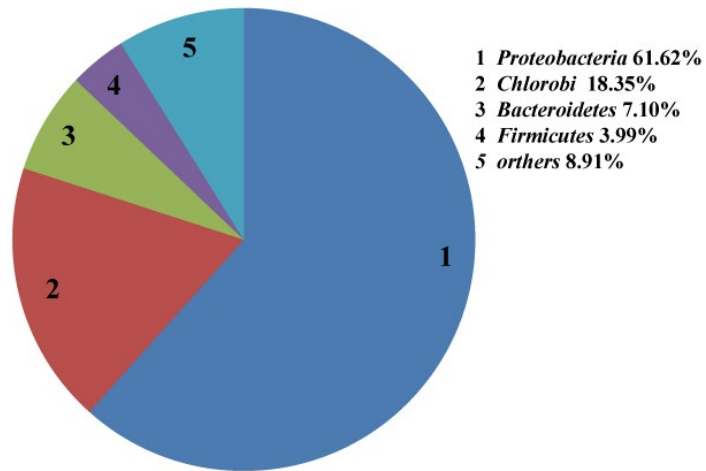

**Fig. S1.** Abundance of bacterial phyla in the total reads in all communities.

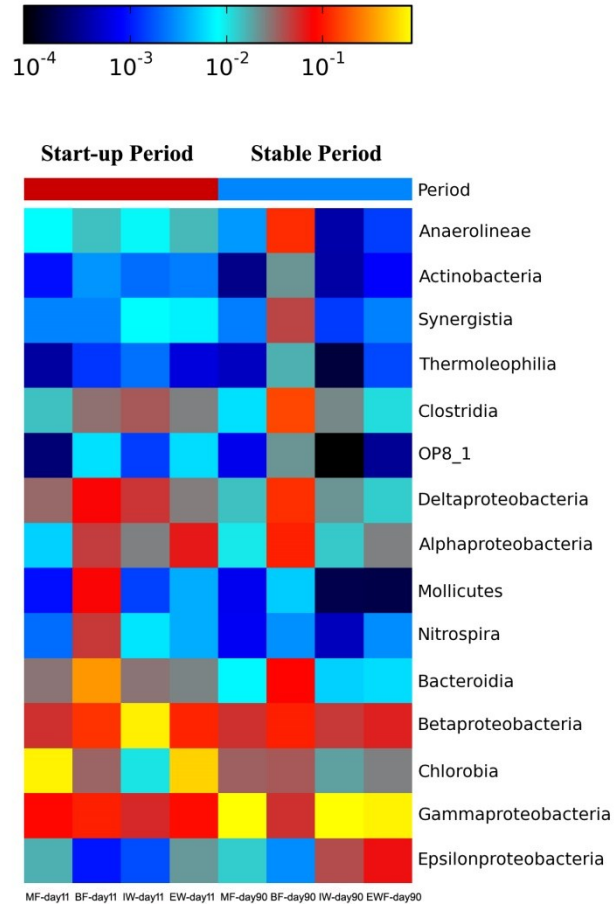

**Fig. S2.** The relative proportions of bacterial populations at the class level in the IW, EW, and biofilm samples of the anaerobic biofilm reactor during the start-up and stable periods. The colors from black to yellow indicate low to high representations of OTUs.

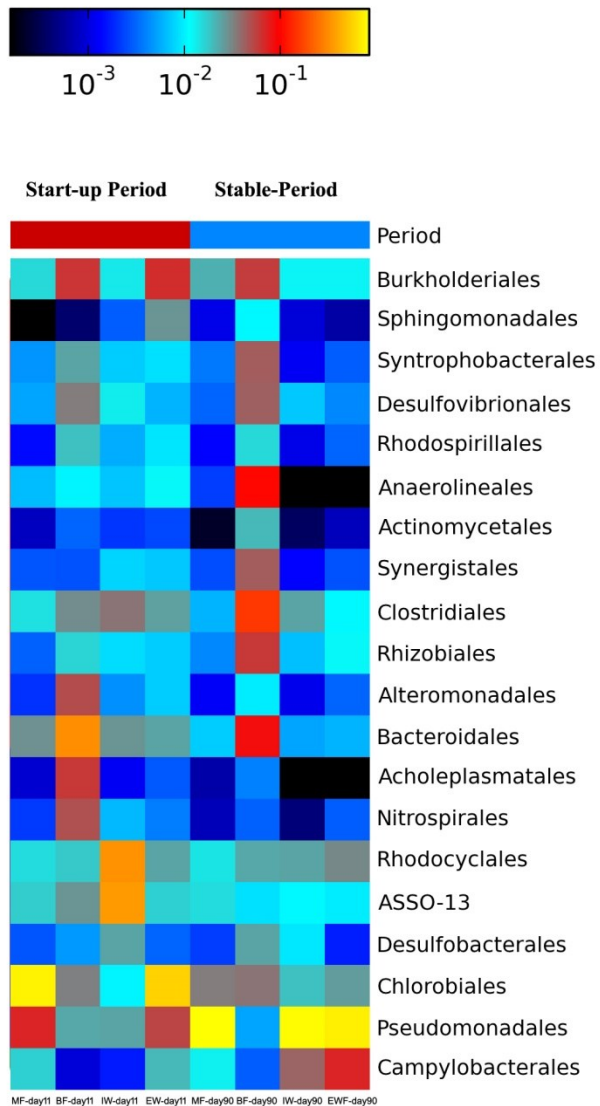

**Fig. S3.** The relative proportions of bacterial populations at the order level in the IW, EW, and biofilm samples of the anaerobic biofilm reactor during the start-up and stable periods. The colors from black to yellow indicate low to high representations of OTUs.

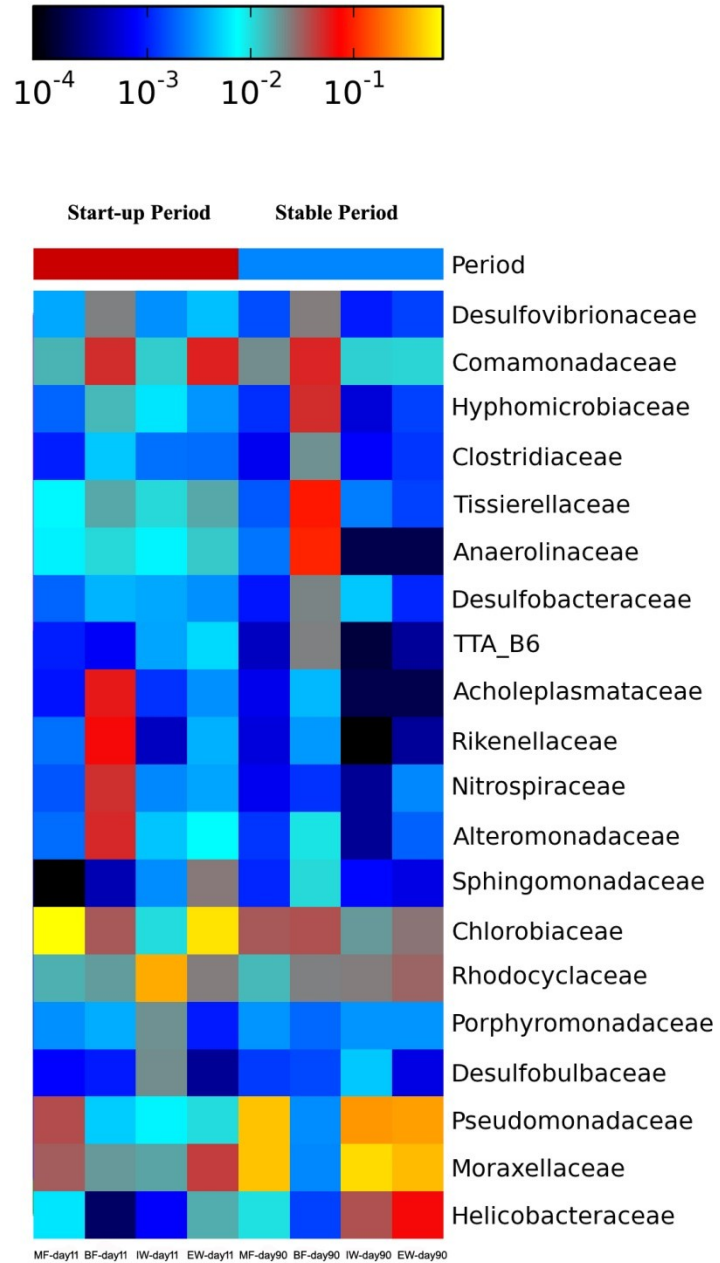

**Fig. S4.** The relative proportions of bacterial populations at the family level in the IW, EW, and biofilm samples of anaerobic biofilm reactor during the start-up and stable periods. The colors from black to yellow indicate low to high representation of OTUs.

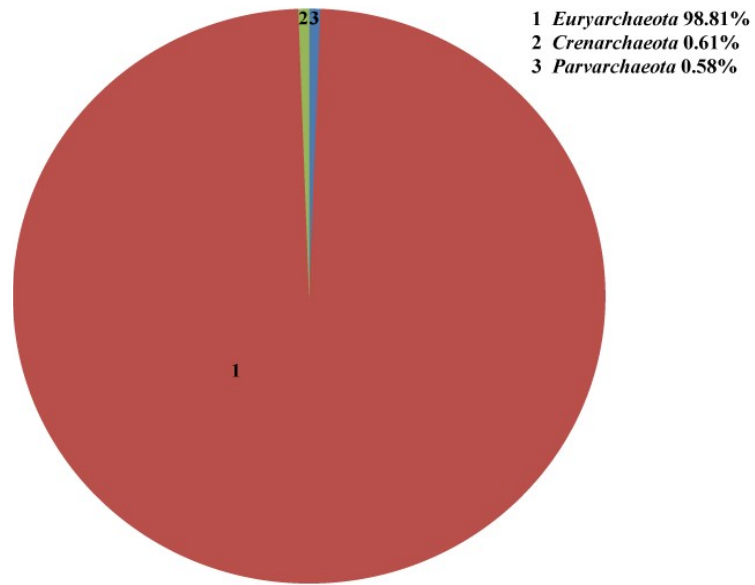

**Fig. S5.** Abundance of archaeal phyla in the total reads in all communities.

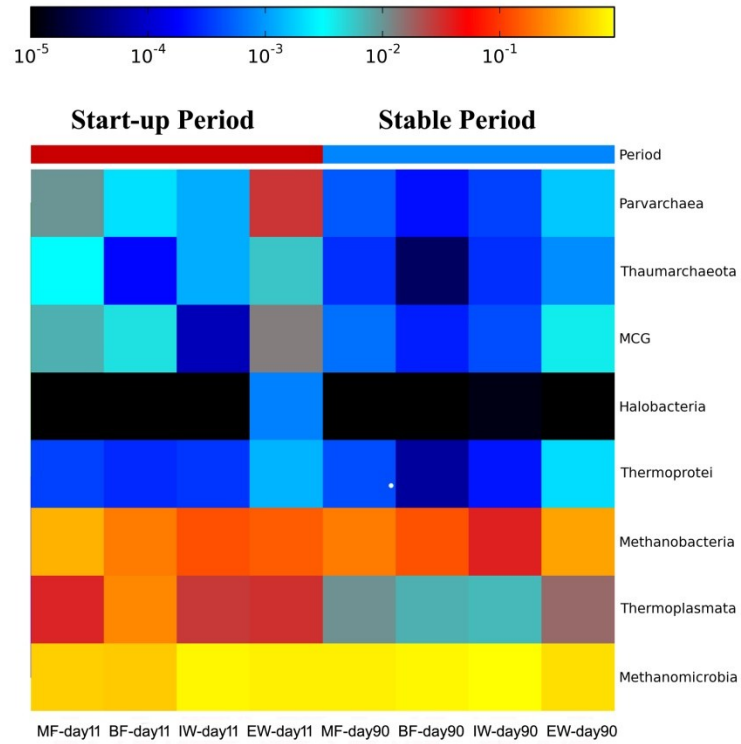

**Fig. S6.** The relative proportions of archaeal populations at the class level in the IW, EW, and biofilm samples of the anaerobic biofilm reactor during the start-up and stable periods. The colors from black to yellow indicate low to high representation of OTUs.

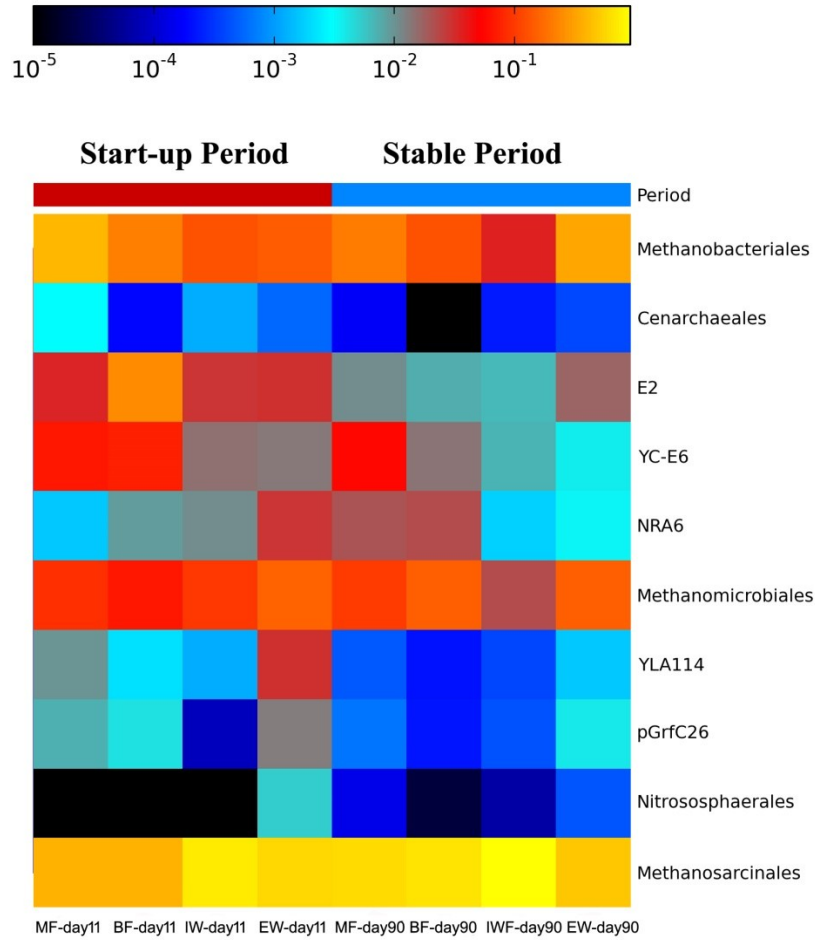

**Fig. S7.** The relative proportions of archaeal populations at the order level in the IW, EW, and biofilm samples of the anaerobic biofilm reactor during the start-up and stable periods. The colors from black to yellow indicate low to high representations of OTUs.



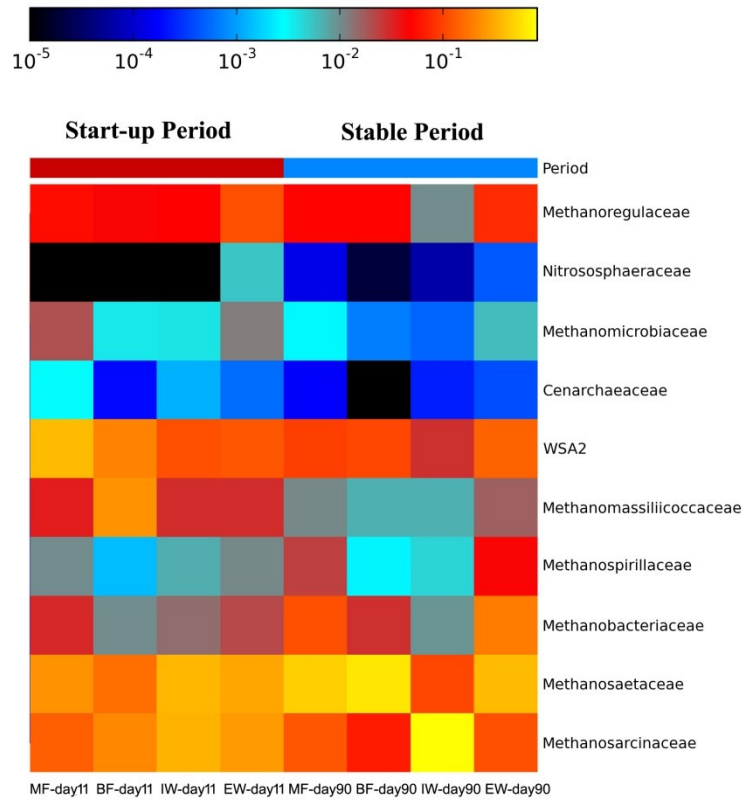

**Fig. S8.** The relative proportions of archaeal populations at the family level in the IW, EW, and biofilm samples of the anaerobic biofilm reactor during the start-up and stable periods. The colors from black to yellow indicate low to high representations of OTUs.

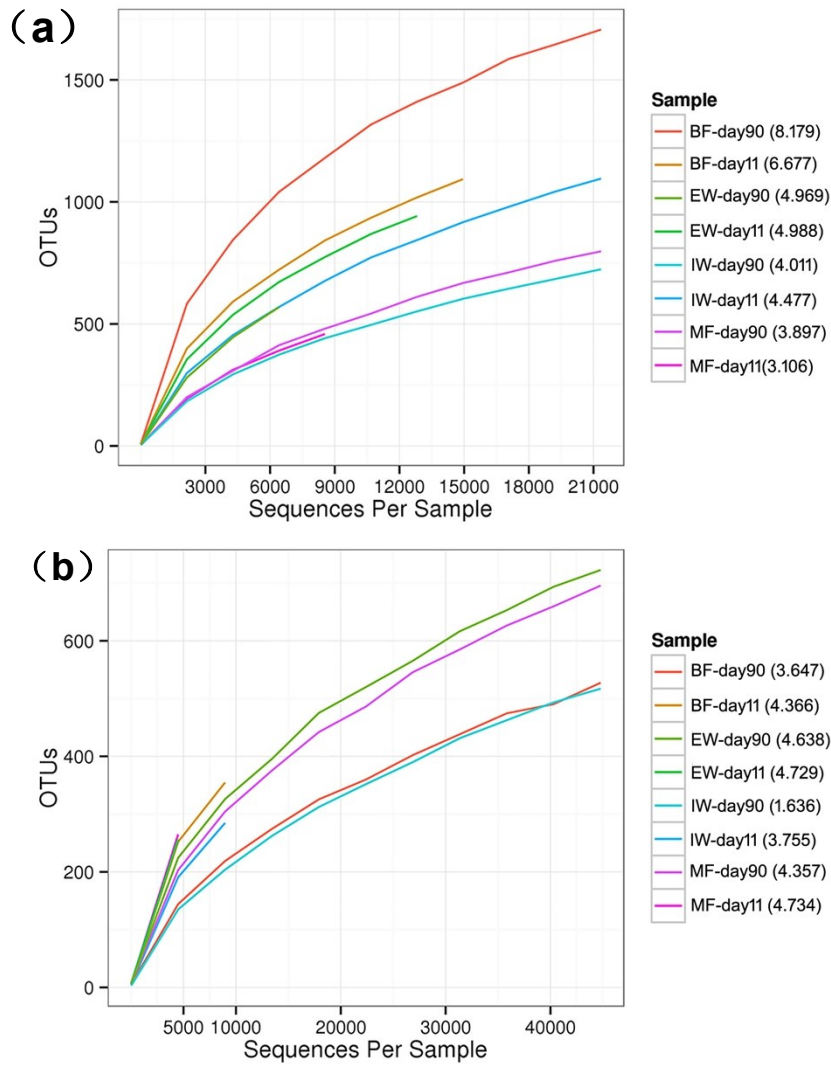

**Fig. S9.** The rarefaction curves of bacteria (a) and archaea (b) in the anaerobic reactor. The rarefaction curves in Figures S9a, b represent the OTUs vs sequences in each sample. MF-day11, BF-day11, IW-day11, and EW-day11 represent the MF, BF, IW, and EW samples from the start-up phase of the AnBR for 11 days and the HRT of 72 h, respectively. MF-day90, BF-day90, IW-day90, and EW-day90 represent the MF, BF, IW, and EW samples from the stable phase of AnBR for 79 days and the HRT of 60 h, respectively. Numbers in parentheses in the legends are the Shannon indices of each sample.

**Table S1.** The parameters of inoculation sludge.

| The test items | Dalian petrochemical mud |
|----------------|--------------------------|
| MLSS (mg/L)    | 36202.0                  |
| MLVSS (mg/L)   | 25072.0                  |
| SVI (mL/g)     | 2486.1                   |
| SV (%)         | 90.0                     |

**Table S2.** All the used PCR primers in this study.

| Target   | Primers            | Number of cycles | PCR conditions       |     |              |    |           |    |            |     | References                 |
|----------|--------------------|------------------|----------------------|-----|--------------|----|-----------|----|------------|-----|----------------------------|
|          |                    |                  | initial denaturation |     | Denaturation |    | Annealing |    | Elongation |     |                            |
|          |                    |                  | °C                   | min | °C           | S  | °C        | S  | °C         | min |                            |
| Bacteria | Bac349F<br>Uni806R | 34               | 94                   | 5   | 96           | 30 | 52        | 30 | 72         | 10  | Takai and Horikoshi (2000) |
| Archaea  | Arc349F<br>Arc806R | 34               | 94                   | 5   | 96           | 30 | 50        | 40 | 72         | 10  | Takai and Horikoshi (2000) |

**Reference:**

Takai, K., Horikoshi, K. 2000. Rapid detection and quantification of members of the archaeal community by quantitative PCR using fluorogenic probes. *Applied and Environmental Microbiology*, 66(11), 5066-5072.
